# Supplementary material for: Chloramphenicol Induces Autophagy and Inhibits the Hypoxia Inducible Factor-1 Alpha Pathway in Non-Small Cell Lung Cancer Cells
Source: Int J Mol Sci. 2019 Jan 3;20(1):157. doi: 10.3390/ijms20010157 (PMC6337541; doi:10.3390/ijms20010157)
Supplement: Supplementary file 1 [file ijms-20-00157-s001.pdf]

## Supplementary Information

**Supplementary Table S1.** Primer sets for qPCR.

| Gene          | Sense primer           | Antisense primer       |
|---------------|------------------------|------------------------|
| <i>VEGF</i>   | GAGATGAGCTTCCTACAGCAC  | TCACCGCCTCGGCTTGTCACAT |
| <i>GLUT-1</i> | CCCGCTTCCTGCTCATCAA    | GACCTTCTTCTCCCGCATCATC |
| <i>GAPDH</i>  | GAAGGTGAAGGTCGGAGTCAAC | CAGAGTTAAAAGCAGCCCTGGT |

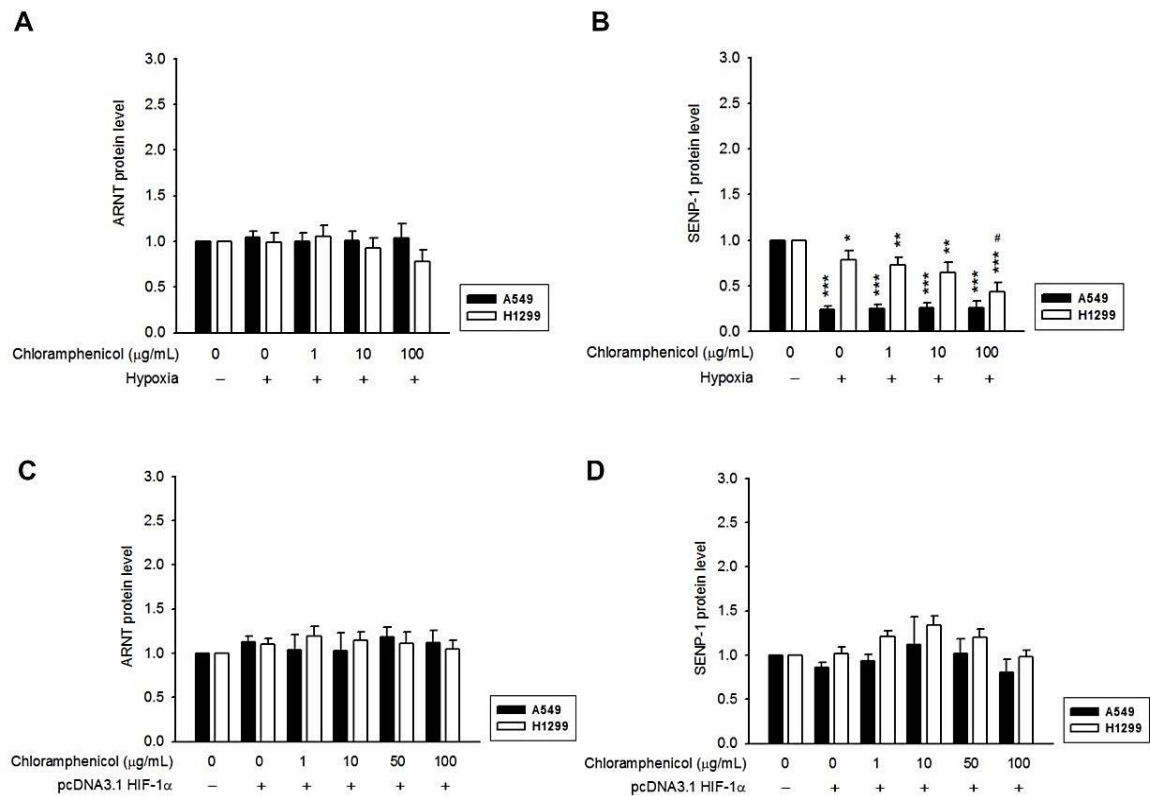

**Supplementary Figure S1.** Quantification data of ARNT and SENP-1 proteins in NSCLC cells after chloramphenicol and hypoxia treatments. Representative images of Western blotting were showed in Figure 1B and 1C. Quantification data of ARNT (**A** and **C**) and SENP-1 (**B** and **D**) indicated that chloramphenicol had no obvious effects on their expression. However, hypoxia treatment (3 h) did reduce SENP-1 content (\*  $p < 0.05$ , \*\*  $p < 0.01$ , and \*\*\*  $p < 0.001$  indicates a statistically significant difference from the control group; #  $p < 0.05$  indicates a statistically significant difference from the hypoxia-treated control).

**A**

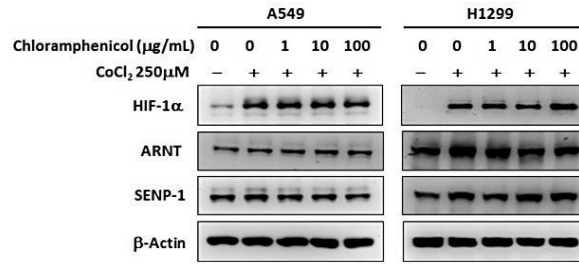

**B**

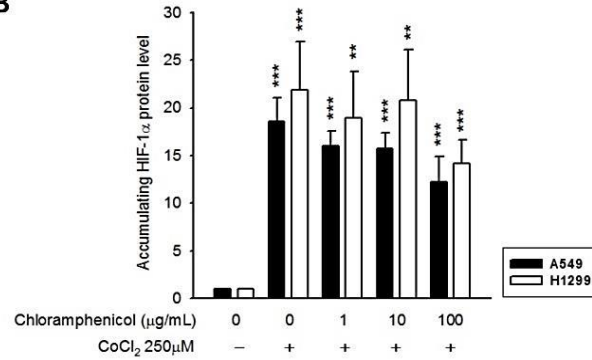

**C**

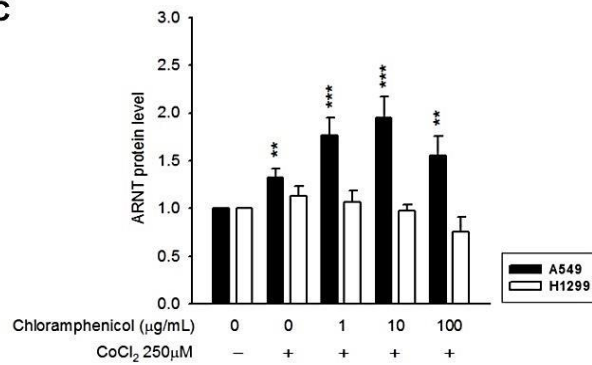

**D**

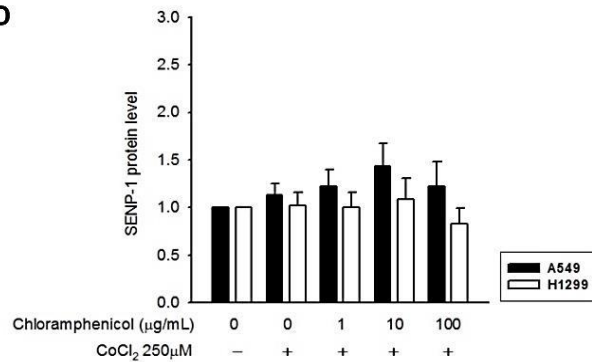

**Supplementary Figure S2.** Chloramphenicol had no effect on CoCl<sub>2</sub>-mediated HIF-1α accumulation. (A) Images showed that CoCl<sub>2</sub> (250 M, 3 h) treatment caused an increase in HIF-1α protein level, which could not be prevented by chloramphenicol pre-incubation. In A549, the expression of ARNT was also upregulated by hypoxia and potentiated by chloramphenicol co-incubation. SENP-1 was without significant changes. Quantified data of HIF-1α (B), ARNT (C) and SENP-1 (D) was generated by densitometry analysis. (\*  $p < 0.05$ , \*\*  $p < 0.01$ , and \*\*\*  $p < 0.001$  indicates a statistically significant difference from the control group).  $N = 5$  (A549) and 3 (H1299).

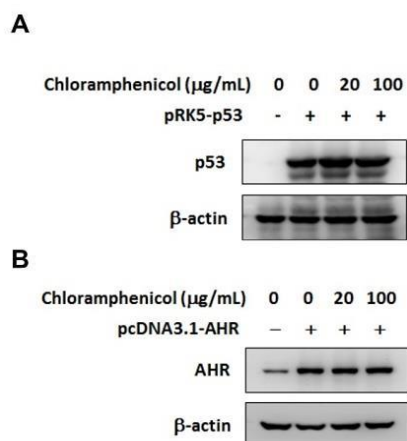

**Supplementary Figure S3.** Chloramphenicol did not down-regulate the ectopic expression of p53 and the acyl hydrocarbon receptor (AHR) in H1299. H1299 was p53-null and AHR poor-expressed, thus an overexpression of p53 and AHR could be observed easily. The amount of p53 (**A**) and AHR (**B**) proteins were without differences between chloramphenicol treated groups and vehicle control, suggested that HIF-1 was a unique target of chloramphenicol.

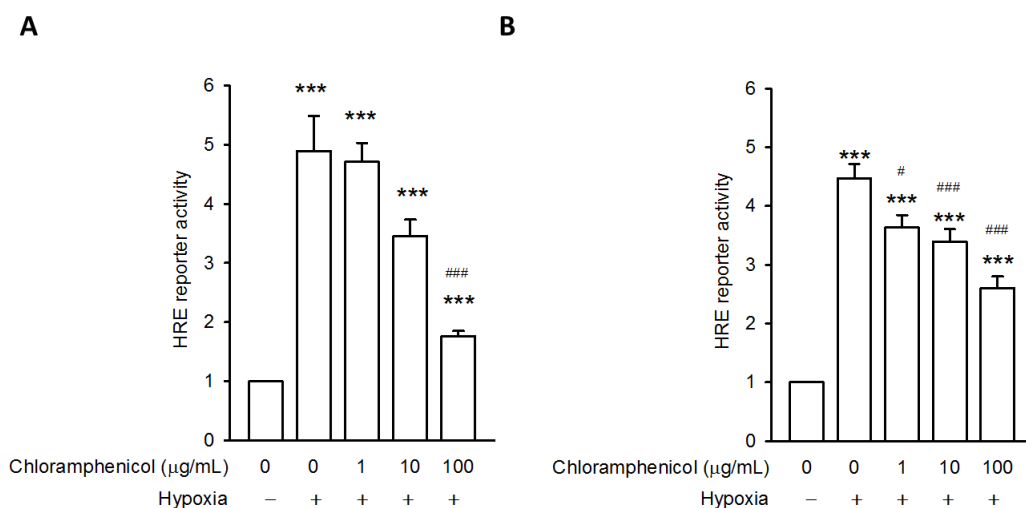

**Supplementary Figure S4.** Chloramphenicol diminished the HRE reporter activity induced by hypoxia. Cells were co-transfected with 2 μg of the HRE luciferase reporter construct (pGL2-HRE) together with 0.5 μg of pRK5-LacZ. After 24 h of transfection, cells were exposed to a hypoxia condition for 6–9 h, and then, cell extracts were harvested. Luciferase activity was measured by using the reporter assay system (Promega, Madison, WI, USA). (\*\*\*)  $p < 0.001$  indicates a statistically significant difference from the control group; #  $p < 0.01$ , and ###  $p < 0.001$  indicates statistically significant difference from the hypoxia-treated control). In Figure 2C, only the highest treatment was shown. (**A**) A549, N = 6; (**B**) H1299, N = 11.

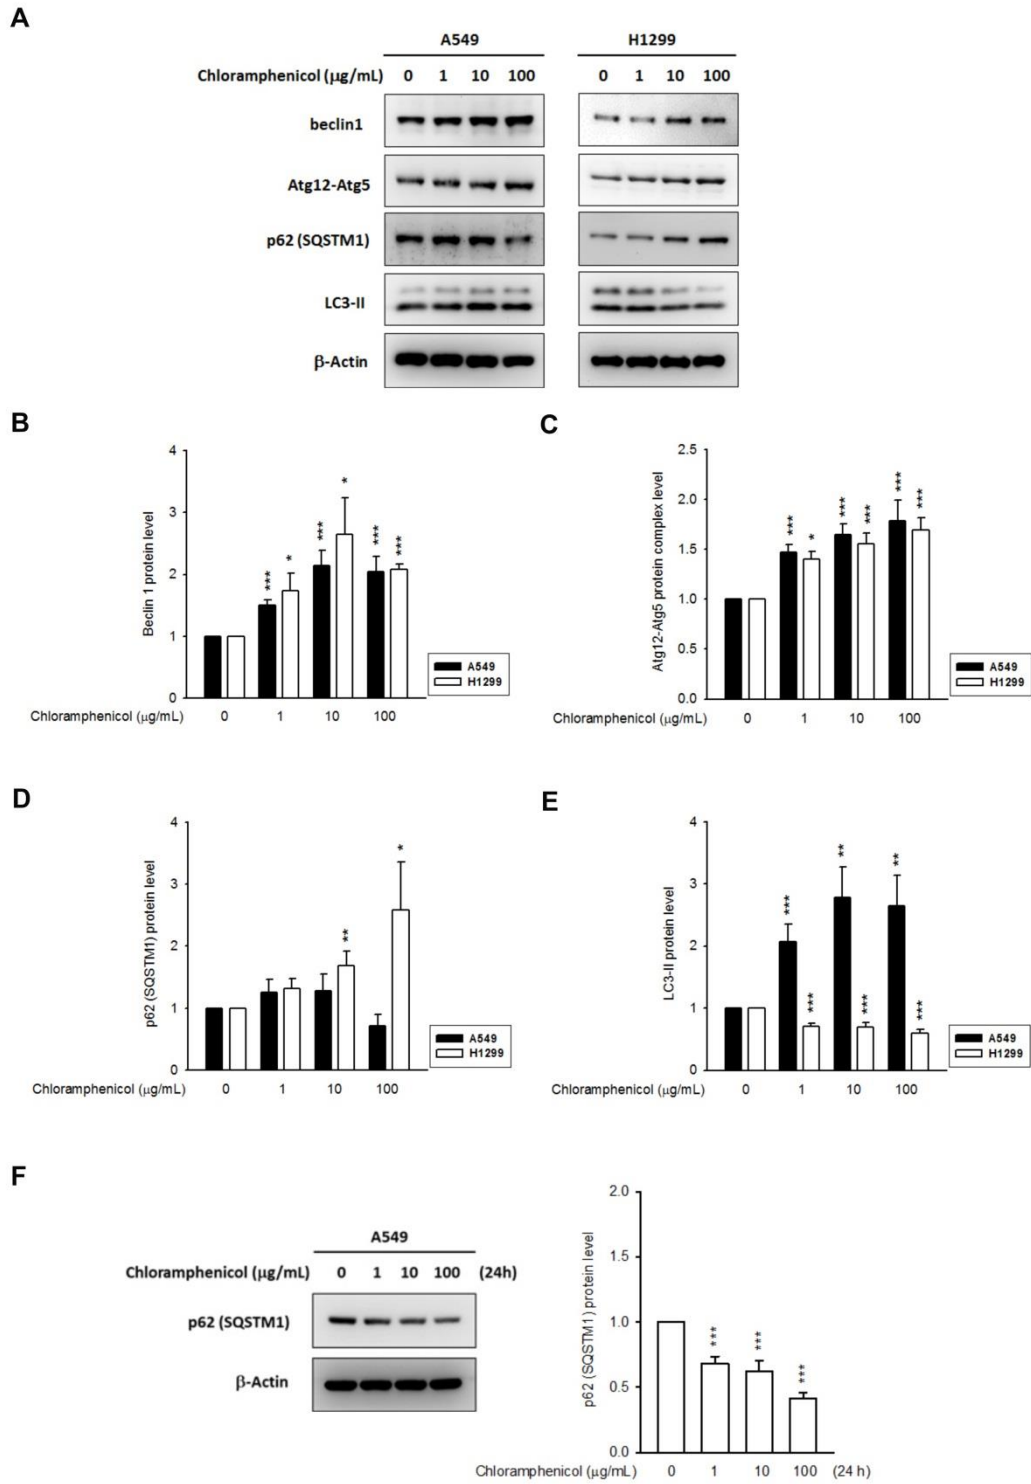

**Supplementary Figure S5.** Chloramphenicol initiated autophagy in NSCLC cells in a concentration-dependent manner. (A) Representative images showed the changes of autophagy biomarkers (beclin 1, Atg12-Atg5 conjugates, p62/SQSTM1, and LC3-II) of A549 and H1299 in response to a 12-h chloramphenicol treatment. Quantitative results of multiple experiments are shown as (B) beclin 1, (C) Atg12-Atg5 conjugates, (D) p62/SQSTM1, and (E) LC3-II. (\*  $p < 0.05$ , \*\*  $p < 0.01$ , and \*\*\*  $p < 0.001$  indicates a statistically significant difference from the control group). (F) A clear concentration-dependent degradation of p62/SQSTM1 was observed in A549 after 24 h of chloramphenicol treatment. N = 4 (A549 and H1299).

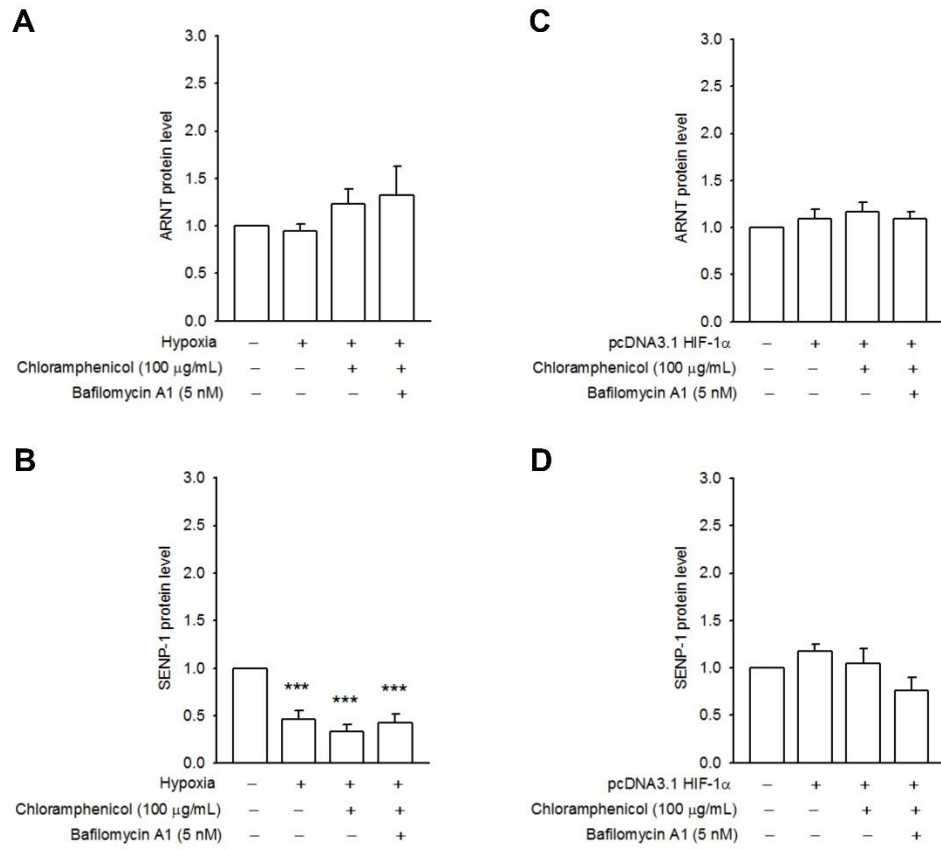

**Supplementary Figure S6.** Quantitative results of Figure 5. Quantitative results of multiple experiments are shown for ARNT (**A/C**) and SENP-1 (**B/D**). (\*\*\*)  $p < 0.001$  indicates statistically significant difference from the control group).  $N = 4$  (A549 and H1299).
